# Supplementary material for: Identification of glycolaldehyde, the simplest sugar, in plant systems
Source: Royal Society of Chemistry journal article supplement (doi:10.1039/d2nj01049f), 2022-01-01
Supplement: d2nj01049f1.pdf [file d2nj01049f1.pdf]

## Electronic Supplementary Information

### The identification of glycolaldehyde, the simplest sugar, in plant systems

Yuehui Li, Duanhui Si, Wenzhe Shang, Jing Wang, Jingya Guo, Naitian  
Zhang, Ce Hao\*, and Yantao Shi\*

#### Affiliations:

State Key laboratory of Fine Chemicals, Department of Chemistry, School of  
Chemical Engineering, Dalian University of Technology, Dalian, 116024, China.

\*Corresponding authors: [shiyantao@dlut.edu.cn](mailto:shiyantao@dlut.edu.cn); [haoce@dult.edu.cn](mailto:haoce@dult.edu.cn);

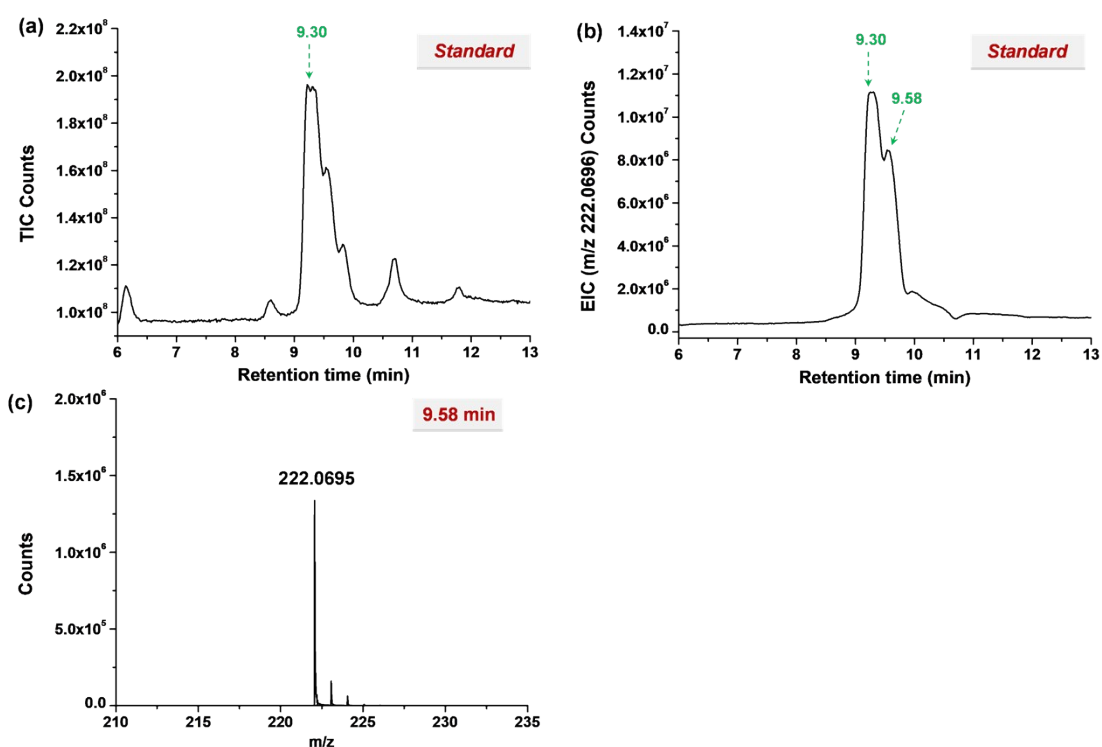

**Fig. S1** (a) (b) LC-MS total ion count (TIC) and extracted ion count (EIC, 222.0696) of MBTH standard sample, respectively. (c) High resolution mass spectrometry of a sample with a retention time of 9.58 min. On the mass spectrometer, all the experiments were performed in positive electrospray ionization (ESI) mode.

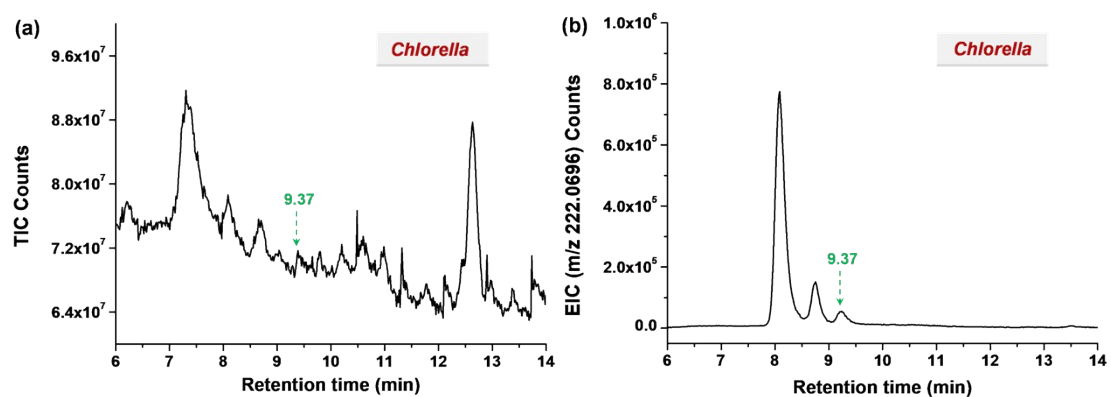

**Fig. S2** (a) (b) LC-MS total ion count (TIC) and extracted ion count (EIC, 222.0696) of *Chlorella*, respectively. On the mass spectrometer, all the experiments were performed in positive electrospray ionization (ESI) mode.

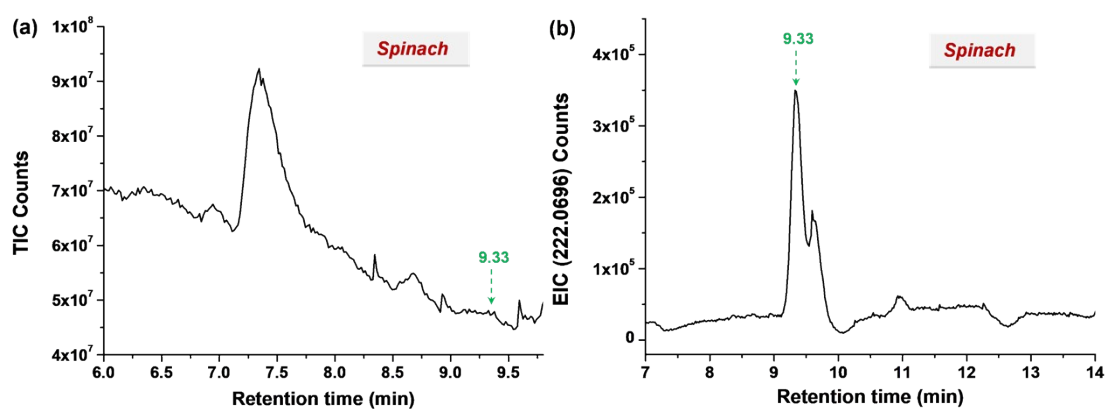

**Fig. S3** (a) (b) LC-MS total ion count (TIC) and extracted ion count (EIC, 222.0696) of Spinach, respectively. On the mass spectrometer, all the experiments were performed in positive electrospray ionization (ESI) mode.

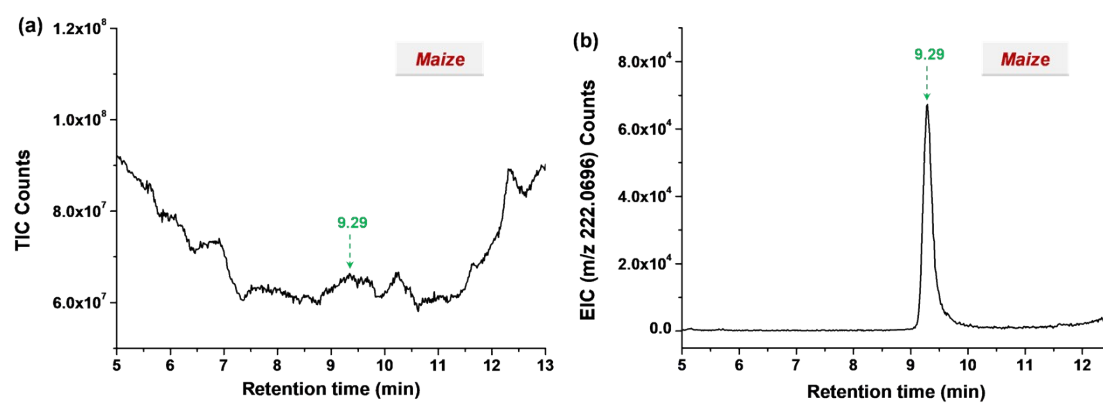

**Fig. S4** (a) (b) LC-MS total ion count (TIC) and extracted ion count (EIC, 222.0696) of maize, respectively. On the mass spectrometer, all the experiments were performed in positive electrospray ionization (ESI) mode.

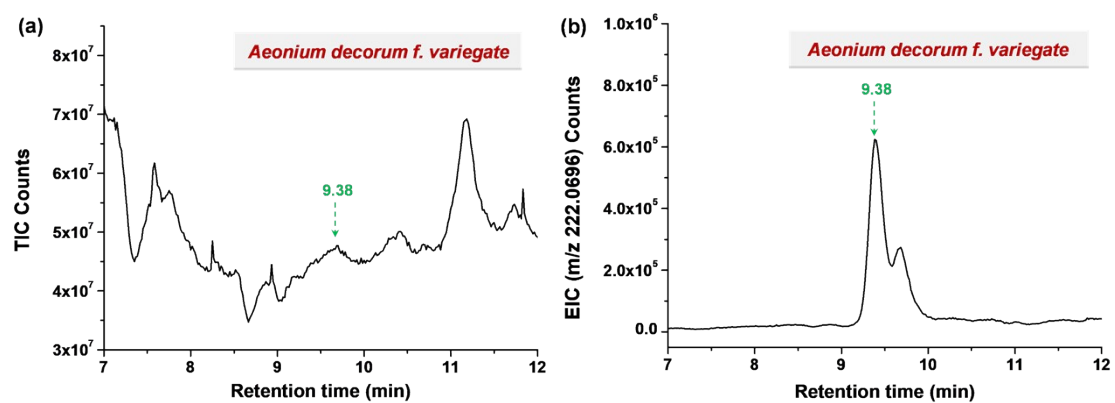

**Fig. S5** (a) (b) LC-MS total ion count (TIC) and extracted ion count (EIC, 222.0696) of *Aeonium decorum f. variegata* of the genus *Aeonium*, respectively. On the mass spectrometer, all the experiments were performed in positive electrospray ionization (ESI) mode.
